## Modeling zero-inflated count data with glmmTMB

Mollie E. Brooks<sup>a,b,h</sup>, Kasper Kristensen<sup>a</sup>, Koen J. van Benthem<sup>b</sup>, Arni Magnusson<sup>c</sup>, Casper W. Berg<sup>a</sup>, Anders Nielsen<sup>a</sup>, Hans J. Skaug<sup>d</sup>, Martin Mächler<sup>e</sup>, Benjamin M. Bolker<sup>f,g</sup>

<sup>a</sup>*National Institute of Aquatic Resources, Technical University of Denmark, Charlottenlund Slot, 2920 Charlottenlund, Denmark*

<sup>b</sup>*Department of Evolutionary Biology and Environmental Studies, University of Zurich, Winterthurerstrasse 190, 8057 Zurich, Switzerland*

<sup>c</sup>*International Council for the Exploration of the Sea, H.C. Andersens Boulevard 44-46, 1553 Copenhagen, Denmark*

<sup>d</sup>*Department of Mathematics, University of Bergen, P.O. Box 7803, 5020 Bergen, Norway*  
<sup>e</sup>*Seminar für Statistik, ETH Zurich, 8092 Zurich, Switzerland*

<sup>f</sup>*Department of Mathematics and Statistics, McMaster University, 1280 Main St W, L8S4L8 Hamilton, Ontario, Canada*

<sup>g</sup>*Department of Biology, McMaster University, 1280 Main St W, L8S4L8 Hamilton, Ontario, Canada*

<sup>h</sup>*corresponding author, email MollieEBrooks@gmail.com*

---

### Abstract

Ecological phenomena are often measured in the form of count data. These data can be analyzed using generalized linear mixed models (GLMMs) when observations are correlated in ways that require random effects. However, count data are often *zero-inflated*, containing more zeros than would be expected from the standard error distributions used in GLMMs, e.g., parasite counts may be exactly zero for hosts with effective immune defenses but vary according to a negative binomial distribution for non-resistant hosts.

We present a new R package, `glmmTMB`, that increases the range of models that can easily be fitted to count data using maximum likelihood estimation. The interface was developed to be familiar to users of the `lme4` R package, a common tool for fitting GLMMs. To maximize speed and flexibility, estimation is done using Template Model Builder (TMB), utilizing automatic differentiation to estimate model gradients and the Laplace approximation for handling random effects. We demonstrate `glmmTMB` and compare it to other available methods using two ecological case studies.

In general, `glmmTMB` is more flexible than other packages available for esti-

mating zero-inflated models via maximum likelihood estimation and is faster than packages that use Markov chain Monte Carlo sampling for estimation; it is also more flexible for zero-inflated modelling than INLA, but speed comparisons vary with model and data structure. Our package can be used to fit GLMs and GLMMs with or without zero-inflation as well as hurdle models. By allowing ecologists to quickly estimate a wide variety of models using a single package, `glmmTMB` makes it easier to find appropriate models and test hypotheses to describe ecological processes.

*Keywords:* abundance, overdispersion, negative binomial, mixed models, hurdle models

---

## 1. Introduction

Ecological phenomena are often measured in the form of discrete count data, e.g., the number of times that owl nestlings beg for food (Roulin & Bersier, 2007), counts of salamanders in streams (Price et al., 2016), or counts of parasite eggs in fecal samples of sheep (Brown et al., 2012). These counts are often analyzed using generalized linear models (GLMs) and their extensions (O’Hara & Kotze, 2010; Wilson & Grenfell, 1997). GLMs quantify how expected counts change as a function of predictor variables, e.g., nestlings change their behavior depending on which parent they interact with (Roulin & Bersier, 2007), salamander abundance decreases in streams affected by coal mining (Price et al., 2016), and helminth infection intensity in sheep varies with age and genotype (Brown et al., 2012). Repeated measurements on the same individual, the same location, or observations taken at the same point in time are often correlated; this correlation can be accounted for using random effects in generalized linear mixed models (GLMMs; Bolker et al., 2009; Bolker, 2015).

These types of count data are commonly modeled with GLMs and GLMMs using either Poisson or negative binomial distributions. For the Poisson distribution, the variance is equal to the mean. When data are overdispersed — meaning the variance is larger than the mean — they are often instead modeled

20 using the negative binomial distribution, which can be defined as a mixture  
of Poisson distributions with Gamma-distributed rates. For the Poisson and  
negative binomial distributions, the expected number of zeros decreases as the  
mean increases. However, when multiple processes underlie the observed counts  
— which is almost ubiquitous in biology — the counts can contain many zeros  
25 even if the mean is much greater than zero. For example, observed counts of  
salamanders could be zero if a stream is uninhabitable due to mining waste, or  
the count could be any integer from zero to infinity depending on other qualities  
of the stream affecting the population density and the salamanders' ability to  
hide from researchers (Price et al., 2016). Zero-inflated GLMs allow us to model  
30 count data using a mixture of a Poisson or negative binomial distribution and a  
structural zero component, i.e., extra zeros. Models that ignore zero-inflation,  
or attempt to handle it in the same way as simple overdispersion, yield biased  
parameter estimates (Harrison, 2014).

Many biologists use the statistical computing environment R and its con-  
35 tributed packages to organize, model, and graph their data (R Core Develop-  
ment Team, 2016). In R, there are five main packages available for modeling  
zero-inflated data: `pascal`, `INLA`, `MCMCglmm`, `glmmADMB`, and `brms` (Table 1; Zeileis  
et al., 2008; Rue et al., 2009; Hadfield, 2010; Skaug et al., 2012; Bürkner, in  
press). The `pascal` package can fit zero-inflated GLMs with predictor variables  
40 on the zero-inflation using maximum likelihood estimation (Zeileis et al., 2008).  
For example, `pascal` can be used to test the hypothesis that sheep fecal egg counts  
depend on age and extra zeros depend on genotype. However, `pascal` cannot  
model the correlation within individuals if they are sampled repeatedly; this phe-  
nomenon requires random effects. Omitting random effects and thereby ignoring  
45 correlation makes statistical tests anti-conservative (Bolker et al., 2009; Bolker,  
2015). The `glmmADMB` package can fit zero-inflated GLMMs that contain ran-  
dom effects to account for correlation among observations (Skaug et al., 2012).  
However, it cannot fit models with predictor variables in the zero-inflation part  
of the model; thus, it is only appropriate for limited cases where all observa-  
50 tional units (e.g., individual sheep) have an equal probability of producing a

structural zero. INLA has the same limitation as `glmmADMB`. The `MCMCglmm` and `brms` packages can fit zero-inflated GLMMs with predictors of zero-inflation, but they are relatively slow because they require Markov chain Monte Carlo (MCMC) sampling (Bürkner, in press; Hadfield, 2010).

55 Here we present a new R package, `glmmTMB`, that estimates GLMs, GLMMs and extensions of GLMMs including zero-inflated GLMMs using maximum likelihood. The ability to fit these types of models quickly and using a single package will make it easier for biologists to find the best model to explain patterns in their data. We demonstrate the package using two examples. We use an ex-  
60 ample of salamander abundance to show how to fit and compare zero-inflated and hurdle GLMMs and then how to extract results from a model. We use a classic example of owl nestling behavior to compare the timing and parameter estimates from `glmmTMB` to other R packages.

**Table 1.** Features implemented in `glmmTMB` and other packages that are used  
65 for modeling zero-inflated count data. `lme4` and `mgcv` are not included because they can only estimate zero-inflation when wrapped in an iterative algorithm (Minami et al., 2007; Bolker et al., 2013).

| Feature                           | glmmTMB        | glmmADMB | pscl | MCMCglmm     | brms | INLA |
|-----------------------------------|----------------|----------|------|--------------|------|------|
| predictors of zero-inflation      | ✓              |          | ✓    | ✓            | ✓    |      |
| predictors of dispersion          | ✓              |          |      |              |      |      |
| zero-truncated distributions      | ✓              | ✓        | ✓    | ✓            | ✓    | ✓    |
| <code>nbinom2</code> distribution | ✓              | ✓        | ✓    |              | ✓    | ✓    |
| <code>nbinom1</code> distribution | ✓              | ✓        |      |              |      |      |
| weights                           | <sup>1</sup>   | ✓        | ✓    |              | ✓    | ✓    |
| offsets                           | ✓              | ✓        | ✓    | <sup>2</sup> | ✓    | ✓    |
| random effects (RE)               | ✓              | ✓        |      | ✓            | ✓    | ✓    |
| various RE structures             | ✓ <sup>3</sup> |          |      | ✓            | ✓    | ✓    |
| maximum likelihood estimation     | ✓              | ✓        | ✓    |              |      |      |
| MCMC sample a fitted model        | ✓ <sup>4</sup> | ✓        |      | ✓            | ✓    | ✓    |
| multivariate responses            |                |          |      | ✓            | ✓    |      |

Notes: <sup>1</sup> Weights are often used to reduce the influence of some observations over  
70 others, e.g., (Gurevitch & Hedges, 1999); `glmmTMB`'s dispersion formula can be  
used to model heteroskedasticity, but might not fill other roles of weights. This  
feature may be added in future versions. <sup>2</sup> Offsets can be implemented using  
priors. <sup>3</sup> See `vignette("covstruct")` for details. <sup>4</sup> See `vignette("mcmc")` for  
details.

## 75 2. Implementation of `glmmTMB`

The design goal of `glmmTMB` is to extend the flexibility of GLMMs in R while  
maintaining a familiar interface. To maximize flexibility and speed, `glmmTMB`'s  
estimation is done using the `TMB` package (Kristensen et al., 2016), but users need  
not be familiar with `TMB`. We based `glmmTMB`'s interface (e.g., formula syntax)  
80 on the `lme4` package — one of the most widely used R packages for fitting  
GLMMs (Bates et al., 2015). Like `lme4`, `glmmTMB` uses maximum likelihood  
estimation and the Laplace approximation to integrate over random effects;  
unlike `lme4`, `glmmTMB` does not have the alternative options of doing restricted  
maximum likelihood (REML) estimation nor using Gauss-Hermite quadrature

85 to integrate over random effects (Bolker et al., 2009; Bolker, 2015). REML may  
be added to `glmmTMB` in the future. The underlying implementation using TMB is  
the major divergence from `lme4` and provides `glmmTMB` with a speed advantage  
when estimating non-Gaussian models (Appendix A) and greater flexibility in  
the types of models it can fit (Table 1). The flexibility of `glmmTMB` enables  
90 users to fit and compare many varieties of models with assurance that the log-  
likelihood values are calculated in comparable ways. Comparing likelihoods of  
models fit by multiple packages is not advisable because some packages drop  
constants from the log-likelihood calculations while others do not.

A `glmmTMB` model has four main components: a conditional model formula,  
95 a distribution for the conditional model, a dispersion model formula, and a  
zero-inflation model formula. Simple GLMs and GLMMs can be fit using the  
conditional model while leaving the zero-inflation and dispersion formulas at  
their default values. The mean of the conditional model is specified using a  
two-sided formula with the response variable on the left and predictors on the  
100 right, potentially including random effects and offsets. This formula uses the  
same syntax as `lme4`. For example, if salamander counts vary by species (`spp`)  
and vary randomly by site, then the formula for the dependence of mean count  
on species could be `count~spp + (1|site)`.

The distribution around the mean of the conditional model is specified using  
105 the argument `family`. For count data, the distribution will typically be either  
Poisson, negative binomial, or binomial, but we do not discuss details of the  
binomial here, because modeling zero-inflation is more common with Poisson  
and negative binomial distributions. The Poisson and negative binomial dis-  
tributions use a log link by default, but identity links can be specified as in  
110 `family=poisson(link="identity")`. `glmmTMB` provides two parameterizations  
of the negative binomial which differ in the dependence of the variance ( $\sigma^2$ ) on  
the mean ( $\mu$ ). For `family=nbinom1`, the variance increases linearly with the  
mean as  $\sigma^2 = \mu(1 + \alpha)$ , with  $\alpha > 0$ ; for `family=nbinom2`, the variance increases  
quadratically with the mean as  $\sigma^2 = \mu(1 + \mu/\theta)$ , with  $\theta > 0$  (Hardin & Hilbe,  
115 2007).

With the default dispersion model (`dispformula=~1`), the dispersion parameter (e.g.,  $\alpha$  or  $\theta$  for the negative binomial distribution) is identical for each observation. Alternatively, the dispersion parameter can vary with fixed effects; in this case, the dispersion model uses a log link. The dispersion model can be  
120 used to account for heteroskedasticity. For example, if the response is more variable (relative to the mean) as the year progresses, then a model with either negative binomial distribution might use the one-sided formula `dispformula=~DOY` where DOY is the day of the year. A description of the dispersion parameter for each distribution can be accessed by typing `?sigma.glmmTMB` in R. The Poisson  
125 and binomial distributions do not use a dispersion parameter.

The zero-inflation model describes the probability of observing an extra (i.e., structural) zero that is not generated by the conditional model. Zero-inflation creates an extra point mass of zeros in the response distribution; the overall distribution is a mixture of the conditional model and zero-inflation model  
130 (Lambert, 1992; Rhodes, 2015). The zero-inflation probability is bounded between zero and one by using a logit link on the zero-inflation model. For example, if salamanders were expected to emerge on some date after observations began being collected, then the model could include the one-sided formula `ziformula=~DOY`. The probability of producing a structural zero can be modeled  
135 as equal for all observations with `ziformula=~1`.

### 3. Installation

The package is available from The Comprehensive R Archive Network (CRAN) via the command `install.packages("glmmTMB")`. Development versions are available from GitHub and can be installed using `devtools` (Wickham & Chang,  
140 2016). Current details for installing development versions should be accessed on the GitHub page <https://github.com/glmmTMB/glmmTMB>.

## 4. Case studies

To illustrate how to use `glmmTMB` and to compare it to other packages, we applied it to two publicly available ecological data sets, both of which are included  
145 in the package.

### 4.1. ABUNDANCE OF SALAMANDERS IN STREAMS

We analyzed counts of salamanders in streams to demonstrate how to use features of `glmmTMB` to do model selection and to output model results. Salamanders of seven different species and life stages were repeatedly sampled and  
150 replaced four times at 23 sites in streams (Fig B.1). Some of the streams were impacted by mountaintop removal and valley filling from coal mining. The data set contains covariates that may affect the habitat suitability of a site and the ability of researchers to capture salamanders that inhabit the site (Price et al., 2016, 2015). Price et al. analyzed the data using a Bayesian model with an  
155 ecological and a sampling component; abundance was estimated with a hurdle Poisson model and then observations were modeled as binomial samples from the abundance. We fit GLMMs, zero-inflated GLMMs, and hurdle models to this data with Poisson and negative binomial distributions on the conditional model. For simplicity, we did not consider all variables that may affect  
160 the counts. As a null model, we assumed that counts varied by species (`spp`) and randomly by site (`site`). We fit models where the mean count additionally depended on mining (`mined`). Our full zero-inflated GLMMs allowed both the conditional and zero-inflation models to differ between mined and unmined sites. The full zero-inflated negative binomial GLMM was fit using the command  
165 `glmmTMB(count~spp * mined + (1|site), ziformula=~spp * mined, family=nbinom2, data=Salamanders)`. As is generally the case for model formulas in R, the `*` indicates an interaction plus main effects. We used Akaike information criteria to compare all models. Then we illustrated the assessment of a zero-inflated model using the `summary`, `predict`, and `simulate` functions (Figs B.2, B.3,  
170 B.4, and B.5). See Appendix B for details, including code. Then, we measured



the time required to fit the most parsimonious model across multiple packages. We performed three sets of timing benchmarks: (1) on simulated data with the same structure as the original data, (2) on the original data replicated to create more observations per site and the same number of sites, (3) on simulated data  
175 with increasing number of sites and the same number of observations per site. Benchmarks were run in parallel using `parLapply` (R Core Development Team, 2016) on a MacBook with 2.7 GHz Intel Core i7 processor, 8 cores, and 16 GB memory.

Of the models we considered, the most parsimonious was a negative binomial  
180 GLMM that allowed salamander counts to vary with species, mining, and their interaction. These results agree with earlier work showing that the negative binomial distribution is often the best fit for abundance data (Warton, 2005). Fitting this model to simulated data with the same structure as the original data was, on average, equally fast in `glmmTMB` and `INLA`, 26 times slower with  
185 `glmmADMB`, 30 times slower with `lme4`, and 274 times slower with `brms` (Fig A.1). Fitting the model to the original data replicated to have more observations per site required, on average, half the time to fit with `INLA` compared to `glmmTMB`, 22 times as long with `glmmADMB`, 30 times as long with `lme4`, and 59 times as long with `brms` (Fig A.2). For simulated data sets with more sites (i.e., more  
190 random effect levels), `INLA`'s estimation time accelerated such that it was faster than `glmmTMB` for data sets with fewer than 5888 sites, but slower for those with more sites (Fig A.3). Benchmarking nuances could be investigated in more detail in future studies.

Two zero-inflated negative binomial models did not converge; they both  
195 allowed zero-inflation to vary by species but not with mining, which could be unreasonable. General model convergence issues are discussed in `vignette("troubleshooting")`.

#### 4.2. BEGGING BEHAVIOR OF OWL NESTLINGS

To further compare R packages for fitting zero-inflated GLMMs, we analyzed counts of begging behavior by owl nestlings. The full analyses can be found  
200 in Appendix C. This example previously appeared in Zuur et al. (2009) and

Bolker et al. (2013) and was originally published by Roulin & Bersier (2007). We compared the estimates of fixed effects and the amount of time required for fitting the same model in `glmmTMB`, `glmmADMB`, `INLA`, `brms`, and `MCMCglmm` (Skaug et al., 2012; Rue et al., 2009; Bürkner, in press; Hadfield, 2010). For  
205 `brms` and `MCMCglmm`, we used the default number of iterations, burn-in samples, and thinning. In each package, we fit zero-inflated Poisson models with five fixed effects, an offset term, and one random effect. We allowed zero-inflation to vary with food treatment and vary randomly with nest. See Appendix C for details of these methods, including code.

210 On a standard laptop computer, it took approximately five seconds to fit a zero-inflated Poisson GLMM in `glmmTMB`; `MCMCglmm` took four times as long as `glmmTMB`, followed by `glmmADMB` (eight times as long) and `brms` (27 or 14 times as long, depending on precompilation). `INLA` was slightly faster than `glmmTMB`. Estimates and confidence (or credible) intervals (CI) from `brms` and `INLA` were  
215 nearly identical to those of `glmmTMB`, when running the Bayesian models with flat priors (Figs C.1 and C.2). Estimates from `glmmADMB` and `glmmTMB` differed slightly, because `glmmADMB` uses numerical adjustments to increase the probability that a model will converge and these change the objective function by a small amount (Fig C.1). Estimates and CI from `MCMCglmm` differed from those  
220 of `glmmTMB` because the Bayesian model included informative priors (Figs C.1 and C.2); some priors were necessary to force part of the model to be treated as an offset rather than as a standard predictor variable.

## 5. Conclusions

We have introduced an R package that can quickly estimate a variety of  
225 models including GLMs, GLMMs, zero-inflated GLMMs, and hurdle models. By providing this flexibility in a single package, we reduce the need for researchers to learn multiple packages. Another benefit is that models estimated with a single package can be compared using likelihood-based methods including information criteria.

230 **Acknowledgements**

Thanks to S. Price for providing the data on salamanders and for helpful comments on the manuscript. Thanks to A. Zuur for providing the data on owl nestlings. This work was supported by grants from the Swiss National Science Foundation (#IZ320Z0\_161670) and from the AD Model Builder Foundation to  
235 MEB.

**References**

- Bates, D., Mächler, M., Bolker, B. M., & Walker, S. (2015). Fitting linear mixed-effects models using lme4. *Journal of Statistical Software*, *67*, 1–48.
- Bolker, B. M. (2015). Linear and Generalized Linear Mixed Models. In G. A.  
240 Fox, S. Negrete-Yankelevich, & V. J. Sosa (Eds.), *Ecological Statistics*. Oxford University Press, Oxford, UK.
- Bolker, B. M., Brooks, M. E., Clark, C. J., Geange, S. W., Poulsen, J. R., Stevens, M. H. H., & White, J.-S. S. (2009). Generalized linear mixed models: a practical guide for ecology and evolution. *Trends in Ecology & Evolution*,  
245 *24*, 127–135.
- Bolker, B. M., Gardner, B., Maunder, M., Berg, C. W., Brooks, M., Comita, L., Crone, E., Cubaynes, S., Davies, T., de Valpine, P., Ford, J., Gimenez, O., Kéry, M., Kim, E. J., Lennert-Cody, C., Magnusson, A., Martell, S., Nash, J., Nielsen, A., Regetz, J., Skaug, H., & Zipkin, E. (2013). Strategies for fitting  
250 nonlinear ecological models in R, AD Model Builder, and BUGS. *Methods in Ecology and Evolution*, *4*, 501–512. doi:10.1111/2041-210X.12044.
- Brown, E. A., Pilkington, J. G., Nussey, D. H., Watt, K. A., Hayward, A. D., Tucker, R., Graham, A. L., Paterson, S., Beraldi, D., Pemberton, J. M., & Slate, J. (2012). Detecting genes for variation in parasite burden and immunological traits in a wild population: testing the candidate gene approach.  
255 *Molecular Ecology*, *22*, 757–773.

- Bürkner, P.-C. (in press). brms: An R package for Bayesian multilevel models using Stan. *Journal of Statistical Software*, .
- Gurevitch, J., & Hedges, L. V. (1999). Statistical issues in ecological meta-analyses. *Ecology*, *80*, 1142–1149. URL: <http://www.jstor.org/stable/177061>.
- Hadfield, J. D. (2010). MCMC methods for multi-response generalized linear mixed models: The MCMCglmm r package. *Journal of Statistical Software*, *33*, 1–22.
- Hardin, J. W., & Hilbe, J. M. (2007). Generalized linear models and extensions.
- Harrison, X. A. (2014). Using observation-level random effects to model overdispersion in count data in ecology and evolution. *PeerJ*, *2*, e616–19.
- Kristensen, K., Nielsen, A., Berg, C. W., Skaug, H., & Bell, B. (2016). TMB: Automatic differentiation and Laplace approximation. *Journal of Statistical Software*, *70*, 1–21.
- Lambert, D. (1992). Zero-inflated Poisson regression, with an application to defects in manufacturing. *Technometrics*, *34*, 1–14.
- Minami, M., Lennert-Cody, C. E., Gao, W., & Román-Verdesoto, M. (2007). Modeling shark bycatch: The zero-inflated negative binomial regression model with smoothing. *Fisheries Research*, *84*, 210–221.
- O’Hara, R. B., & Kotze, D. J. (2010). Do not log-transform count data. *Methods in Ecology and Evolution*, *1*, 118–122.
- Price, S. J., Muncy, B. L., Bonner, S. J., Drayer, A. N., & Barton, C. D. (2015). Data from: Effects of mountaintop removal mining and valley filling on the occupancy and abundance of stream salamanders. doi:doi:10.5061/dryad.5m8f6.
- Price, S. J., Muncy, B. L., Bonner, S. J., Drayer, A. N., & Barton, C. D. (2016). Effects of mountaintop removal mining and valley filling on the occupancy and

- abundance of stream salamanders. *Journal of Applied Ecology*, *53*, 459–468.  
285 doi:10.1111/1365-2664.12585.
- R Core Development Team (2016). *R: A Language and Environment for Statistical Computing*. Vienna, Austria.
- Rhodes, J. R. (2015). Mixture models for overdispersed data. In G. A. Fox, S. Negrete-Yankelevich, & V. J. Sosa (Eds.), *Ecological Statistics*. Oxford  
290 University Press, Oxford, UK.
- Roulin, A., & Bersier, L. (2007). Nestling barn owls beg more intensely in the presence of their mother than in the presence of their father. *Animal Behaviour*, *74*, 1099–1106. doi:10.1016/j.anbehav.2007.01.027.
- Rue, H., Martino, S., & Chopin, N. (2009). Approximate bayesian inference  
295 for latent gaussian models by using integrated nested laplace approximations. *Journal of the royal statistical society: Series b (statistical methodology)*, *71*, 319–392.
- Skaug, H., Fournier, D., Nielsen, A., Magnusson, A., & Bolker, B. M. (2012). *glmmADMB: Generalized Linear Mixed Models using AD Model Builder*.
- 300 Warton, D. I. (2005). Many zeros does not mean zero inflation: comparing the goodness-of-fit of parametric models to multivariate abundance data. *Environmetrics*, *16*, 275–289.
- Wickham, H., & Chang, W. (2016). *devtools: Tools to Make Developing R Packages Easier*. URL: <https://CRAN.R-project.org/package=devtools>  
305 r package version 1.12.0.
- Wilson, K., & Grenfell, B. T. (1997). Generalized linear modelling for parasitologists. *Parasitology Today*, *13*, 33–38.
- Zeileis, A., Kleiber, C., & Jackman, S. (2008). Regression models for count data in R. *Journal of Statistical Software*, *27*, 1–25.

<sup>310</sup> Zuur, A. F., Ieno, E. N., Walker, N. J., Saveliev, A. A., & Smith, G. M. (2009).  
*Mixed Effects Models and Extensions in Ecology with R*. Springer.
